# Supplementary material for: Systems medicine disease maps: community-driven comprehensive representation of disease mechanisms
Source: PubMed Central journal article supplement (PMC5984630; doi:10.1038/s41540-018-0059-y), 2018-06-02
Supplement: 41540_2018_59_MOESM1_ESM.pdf [file 41540_2018_59_MOESM1_ESM.pdf]

## **Supplementary material S1**

The authors' experience of participating in large-scale translational research projects

### **U-BIOPRED, Unbiased Biomarkers for the Prediction of Respiratory Disease Outcomes**

[www.imi.europa.eu/content/u-biopred](http://www.imi.europa.eu/content/u-biopred)

[www.europeanlung.org/projects-and-research/projects/u-biopred/home](http://www.europeanlung.org/projects-and-research/projects/u-biopred/home)

2009 - 2015

Funded under: IMI (<http://www.imi.europa.eu/>)

Authors participated: Bertrand De Meulder, Diane Lefaudeux, Alexander Mazein, Charles Auffray

### **eTRIKS, European Translational Information & Knowledge Management Services**

[www.imi.europa.eu/content/etriks](http://www.imi.europa.eu/content/etriks)

[www.etriks.org](http://www.etriks.org)

2012 - 2017

Funded under: IMI (<http://www.imi.europa.eu/>)

Authors participated: Mansoor Saqi, Irina Balaur, Alexander Mazein, Bertrand De Meulder, Diane Lefaudeux, Charles Auffray

### **MeDALL, Mechanisms of the Development of Allergy**

[www.medalldatabase.com](http://www.medalldatabase.com)

2010 - 2015

Funded under: FP7-HEALTH

Authors participated: Nathanaël Lemonnier, Johann Pellet, Charles Auffray

### **PRECISE: Personalized Engine for Cancer Integrative Study and Evaluation**

2015 - 2018

<http://precise-project.eu/>

Funded under: EU Horizon 2020

Authors participating: Andrei Zinovyev, Emmanuel Bartillot

### **COLOSYS: A systems approach to preventing drug resistance in colon cancer**

2015 - 2018

<http://www.colosys.org>

Funded under: EU ERACoSysMed-1

Authors participating: Inna Kuperstein, Andrei Zinovyev, Emmanuel Bartillot

### **Agilent Thought Leader Award**

2013 - 2016

<http://sysbio.curie.fr/projects.html>

Funded under: Agilent Thought Leader Award to the "Computational Systems Biology of Cancer" team in Curie Institut

Authors participated: Inna Kuperstein, Andrei Zinovyev, Emmanuel Bartillot

**APO-SYS: Apoptosis systems biology applied to cancer and AIDS. An integrated approach of experimental biology, data mining, mathematical modelling and molecular medicine**

2008 - 2012

[http://cordis.europa.eu/project/rcn/88080\\_en.html](http://cordis.europa.eu/project/rcn/88080_en.html)

[http://cordis.europa.eu/result/rcn/56809\\_en.html](http://cordis.europa.eu/result/rcn/56809_en.html)

Funded under: EU FP7-HEALTH

Authors participated: Andrei Zinovyev, Emmanuel Bartillot

**ASSET: Analysing and Striking the Sensitivities of Embryonal Tumours**

2010 - 2016

<http://www.ucd.ie/sbi/asset>

Funded under: EU FP7-HEALTH

Authors participated: Andrei Zinovyev, Emmanuel Bartillot

**ESBIC-D: European systems biology initiative for combating complex diseases**

2005 - 2008

[http://cordis.europa.eu/publication/rcn/12855\\_en.html](http://cordis.europa.eu/publication/rcn/12855_en.html)

[http://cordis.europa.eu/result/rcn/51789\\_en.html](http://cordis.europa.eu/result/rcn/51789_en.html)

Funded under: EU FP6

Authors participated: Andrei Zinovyev, Emmanuel Bartillot

**SHIVA trial: Toward a therapeutic decision based on tumour molecular profile NCT01771458**

2012 - 2015

[https://siric.institut-curie.org/news/faits-marquants/shiva-first-randomised-precision-medicine-trial?\\_ga=1.136781616.1038784660.1371629844](https://siric.institut-curie.org/news/faits-marquants/shiva-first-randomised-precision-medicine-trial?_ga=1.136781616.1038784660.1371629844)

Funded under: French national grant

Authors participated: Andrei Zinovyev, Emmanuel Bartillot

## **Supplementary material S2**

### **Complex intervention gene sets derived from data-driven network analysis for cancer patients**

Targeted therapies seem to be particularly promising for cancer treatment, though novel questions have arisen concerning tumour resistance during treatment with these novel drugs. A possible explanation is that the signal could eventually find an alternative pathway leading to cell division. A computational strategy was developed for identifying such alternative pathways based on the analysis of a detailed reaction network of MAPK pathway: 1) identification of tumour stage-specific active modules compared to normal cells using GSEA method<sup>1</sup> and 2) computation of optimal intervention points, whose disruption blocks all the proliferative pathways<sup>2</sup>. Minimal hitting sets (blocking sets with no blocking subsets) can be computed using the OCSANA algorithm, which optimises the trade-off between the number of components to disrupt and the potential side effects on the final global phenotype<sup>3</sup>. The procedure was applied to five different bladder tumour stages. For each of them, differential gene expression levels were computed using publicly available high-throughput expression

data for a cohort of bladder tumours<sup>4</sup>. To block the ‘proliferation’ phenotype, players from each pathway should be tucked together<sup>2</sup> (Figure S1).

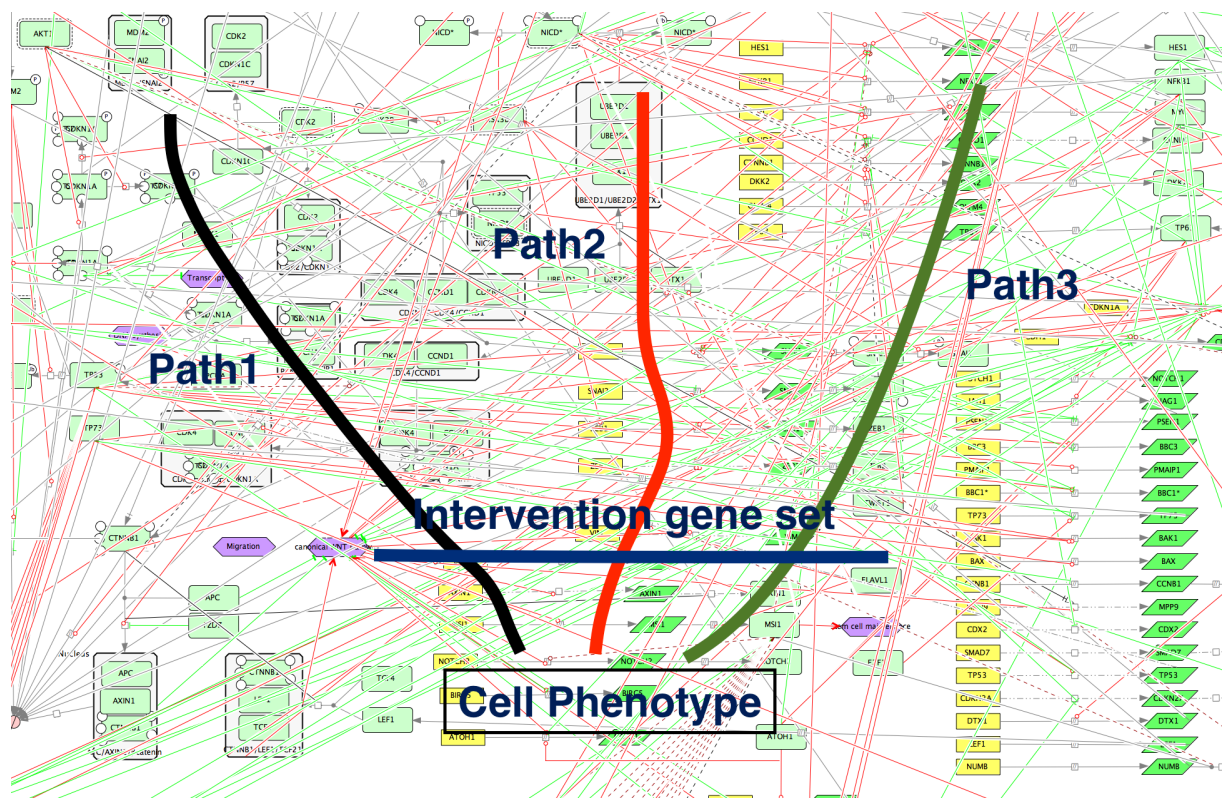

**Figure S1. Schematic representation of intervention gene set principle.** Various pathways in the signalling network contribute to a phenotype. To block phenotype, players from each pathway should be tucked together<sup>2</sup>.

## References

1. Subramanian, A. *et al.* Gene set enrichment analysis: a knowledge-based approach for interpreting genome-wide expression profiles. *Proc. Natl. Acad. Sci. U. S. A.* **102**, 15545–15550 (2005).
2. Kuperstein, I. *et al.* The shortest path is not the one you know: application of biological network resources in precision oncology research. *Mutagenesis* **30**, 191–204 (2015).
3. Vera-Licona, P., Bonnet, E., Barillot, E. & Zinovyev, A. OCSANA: optimal combinations of interventions from network analysis. *Bioinforma. Oxf. Engl.* **29**, 1571–1573 (2013).
4. Stransky, N. *et al.* Regional copy number-independent deregulation of transcription in cancer. *Nat. Genet.* **38**, 1386–1396 (2006).
